# Supplementary material for: Recognition of apnea and hypopnea by non-contact optical fiber mattress and its application in the diagnosis of obstructive sleep apnea hypopnea syndrome: a retrospective study
Source: PeerJ journal article supplement (doi:10.7717/peerj.17570), 2024-06-17

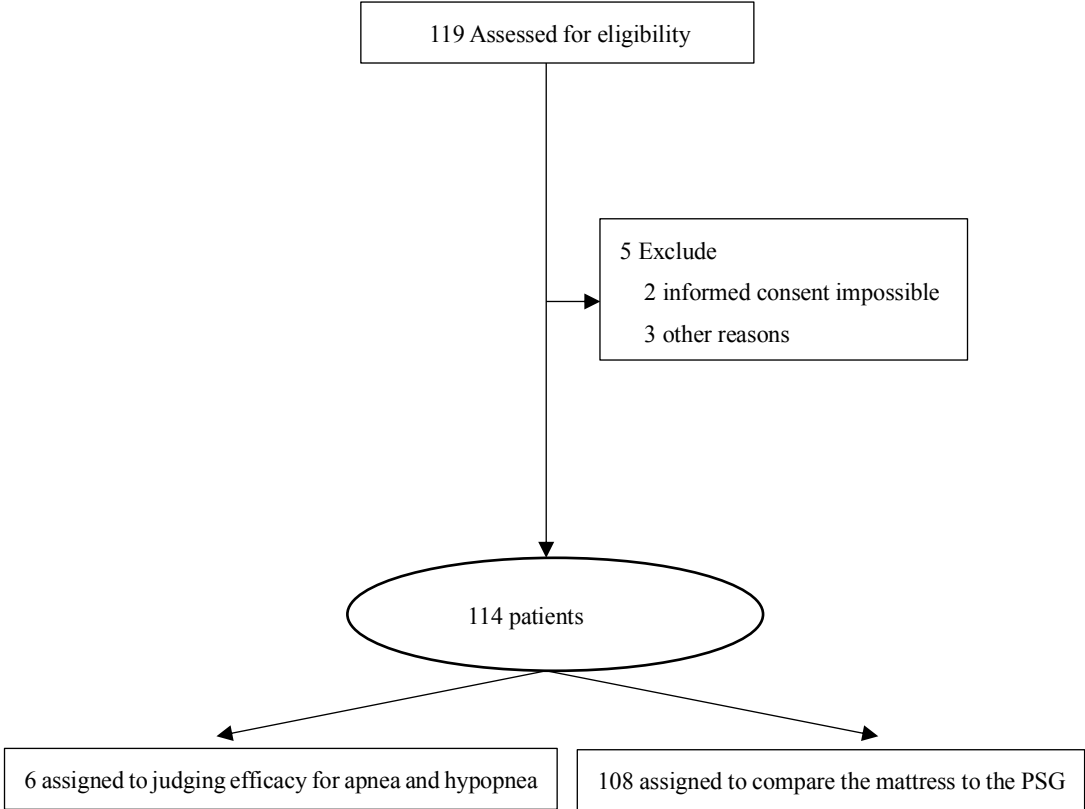

Supplement: Sflowchart1.pdf [file Sflowchart1.pdf]
