# Supplementary material for: Recognition of apnea and hypopnea by non-contact optical fiber mattress and its application in the diagnosis of obstructive sleep apnea hypopnea syndrome: a retrospective study
Source: PeerJ. 2024 Jun 17;12:e17570. doi: 10.7717/peerj.17570 (PMC11188932; doi:10.7717/peerj.17570)
Supplement: Supplemental Information 2 [file peerj-12-17570-s002.xlsx]

## Sheet: Sheet1
Part1	Patient number	patients group(1:healthy 2:OSAHS)	sleep apnea index by PSG	sleep apnea index by mattress	hypopnea index by PSG	hypopnea index by mattress		Part2	age	sex（1:man；2:女woman	hypertension（1:yes）	diabetes （1:yes）	coronary disease（1:yes）	gastroesophageal reflux（1:yes）	BMI	neck circumference	waistline	A history of snoring	AHI by PSG	AHI by mattress	The time of recording by PSG	The time of recording by mattress	Sleep time by PSG	Sleep time by mattress	Sleep efficiency by PSG	Sleep efficiency by mattress	sleep apnea index by PSG	sleep apnea index by mattress	hypopnea index by PSG	hypopnea index by mattress	average heart rate by PSG	average heart rate by mattress	Heart rate overspeed index by PSG	Heart rate overspeed index by mattress	Heart rate overload index by PSG	Heart rate overload index by mattress	Body movement index by PSG	Body movement index by mattress	Maximum duration of apnea, s by PSG	Maximum duration of apnea, s by mattress	Apnea-averaged time, secs，by PSG	Apnea-averaged time, secs，by mattress	Maximum duration of hypoventilation, secs，by PSG	Maximum duration of hypoventilation, secs，by mattress	Mean duration of hypoventilation, secs，by PSG	Mean duration of hypoventilation, secs by mattress	Total time of apnea as a percentage of total sleep time by mattress	Total time of apnea as a percentage of total sleep time by mattress	Total time of hypoventilation as a percentage of total sleep duration by mattress
6+6=12patients	1	1	0.4	1.4	0.6	3.4		108 patients	56	2					21.79	36	83	34	0.2	1.92	7.3	8.9	4.58	3.9	0.712329	0.438202	0	0.768	0.2	1.152	67	73	3.7	4	1.6	31	1.4	4	16	16	0	0	16	16	16	13	0	0	0.000194081
	2	1	1.4	3.5	1.5	7.6			56	2					27.06	36	80	12	0.3	0.83	7.6	8.3	3.48	4.3	0.578947	0.518072	0	0.332	0.3	0.498	52	81	0.5	5	0.3	4	2.1	2	10	42	0	0	10	42	10	16	0	0	0.000239464
	3	1	0.6	10	2.4	3.2			56	1					19.88	36	80	9	0.4	2.63	7.6	8.6	5.39	4.4	0.697368	0.511628	0	1.052	0.4	1.578	67	74	1.6	25	3.9	4	1.4	3	52	14	0	0	52	14	32.6	11	0	0	0.000672026
	4	1	0.8	1.8	3.3	2.4			56	2	1				25	41	84	14	0.5	2.66	7.4	7.7	3.59	4.5	0.608108	0.584416	0	1.064	0.5	1.596	63	67	2.8	11	3	5	2.3	4	21	15	0	0	21	15	16.1	11	0	0	0.000622872
	5	1	2.5	1.9	1.4	2.8			56	1					24.09	40	85	12	0.8	3.95	8.2	7.2	5.12	4.6	0.585366	0.638889	0	1.58	0.8	2.37	65	72	7.4	12	9.7	5	1.2	5	23	15	0	0	23	15	17.9	13	0	0	0.00077691
	6	1	1.6	0.4	2.8	3.6			51	1					25.83	37	84	15	0.2	5.63	7.9	7.7	5.2	4.7	0.56962	0.61039	0	2.252	0.2	3.378	68	84	26	5	6	2	27	56	17	12	12	0	17	12	12	11	0	0	0.000123077
	7	2	8.5	3.2	12.4	5.4			47	1	1	1			24.1	36	76	23	0.3	0.34	7.6	7.6	4.4	5	0.815789	0.657895	0	0.136	0.3	0.204	68	63	16	4	6	6	40	14	34	40	21	0	34	40	20	25	0	0	0.000381818
	8	2	12.3	17.4	11.4	12.4			56	1			1		21.79	34	81	19	0.4	2.18	6.6	7.7	5.3	5.1	0.893939	0.662338	0.4	0.872	0	1.308	69	71	4	6	33	33	44	20	16	17	11	0	16	17	11	12	0.000230608	0	0
	9	2	9.5	9.1	8.5	6.7			37	1		1			20.1	40	92	14	0.5	5.64	8.2	6.7	4.5	6.5	0.560976	0.970149	0.5	2.256	0	3.384	62	52	9	6	15	14	23	28	18	13	11	45	18	13	11	11	0.000339506	0.00433846	0
	10	2	8.5	6.8	21.5	24.5			53	1	1				26.57	36	80	11	0.8	1.24	7.7	6.8	4.8	5.3	0.545455	0.779412	0.6	0.496	0.2	0.744	72	61	16	6	13	15	24	14	14	23	11	17	14	23	11	14	0.000381944	0.00044193	0.000122222
	11	2	21.4	17.5	43.2	37.5			32	1			1		34.27	36	87	12	1	2.59	7.8	7	4.5	6	0.653846	0.857143	0.4	1.036	0.6	1.554	64	67	3	9	27	38	25	14	28	43	15	34	28	43	14	34	0.00037037	0.00163074	0.000533333
	12	2	15.6	17.7	18.5	20.1			38	1				1	29.38	39	85	20	1.1	1.13	8.6	7.6	6.2	5.5	0.593023	0.723684	0.4	0.452	0.7	0.678	68	85	23	19	34	4	22	32	16	32	12	18	16	32	12	19	0.000215054	0.00041091	0.00036129
									47	1	1				26.45	37	83	23	1.2	1.08	6.8	6.7	5.9	5.6	0.808824	0.835821	0.4	0.432	0.8	0.648	65	59	5	11	14	5	21	24	15	34	11	26	15	34	11	20	0.000207156	0.00055714	0.00039774
									34	2					20.7	39	85	8	1.4	2.28	8.5	7.5	4.6	5.7	0.6	0.76	0.3	0.912	1.1	1.368	66	60	3	6	22	8	65	16	28	35	12	13	28	35	12	14	0.000217391	0.00057778	0.000765217
									49	1		1			24.3	36	81	112	2.5	3.52	7.6	7.2	4.2	4.2	0.578947	0.583333	0.5	1.408	1	2.112	64	62	13	57	34	7	29	13	15	14	11	45	15	14	11	11	0.000363757	0.00419048	0.000698413
									51	1					25.59	39	87	14	1.7	1.35	7.7	7.3	5.1	5.9	0.636364	0.808219	0.5	0.54	1.2	0.81	62	60	5	5	54	13	26	72	18	43	12	27	18	43	12	28	0.000326797	0.00068644	0.000752941
									55	2					32.87	37	87	23	1.8	0.85	8.5	7.5	5.1	4.6	0.635294	0.613333	0.4	0.34	1.4	0.51	64	61	6	4	7	26	27	36	24	12	15	14	24	12	14	11	0.000326797	0.00028744	0.00109804
									29	1		1			31.51	39	89	25	3.5	5.12	8.3	7.3	5.5	6	0.662651	0.821918	0.6	2.048	1.3	3.072	63	67	3	2	6	17	22	44	14	12	11	47	14	12	11	11	0.000333333	0.0044563	0.000693333
									38	1				1	29.32	32	85	12	4	1.67	7.2	7.6	5.1	6.3	0.777778	0.828947	1.2	0.668	0.8	1.002	65	67	25	2	65	40	27	28	18	13	12	48	18	13	12	10	0.000784314	0.00141376	0.000501961
									38	1	1				23.81	36	80	11	5.1	3.25	8.9	8.7	4.16	4.3	0.629213	0.494253	2.1	1.3	3	1.95	92	68	8.8	6	10.3	20	1.6	4	86	19	16	14	86	19	32.4	11	0.00224359	0.00117571	0.00649039
									36	2					24.03	39	87	12	5.3	14.22	6.5	6.9	5.16	3.9	0.953846	0.565217	0.9	5.688	4.4	8.532	71	62	13.1	4	15	60	1.7	4	83	36	12.2	17	83	36	23.8	36	0.000591085	0.00688718	0.00563738
									52	1					28.04	42	92	21	6.4	8.33	7.6	7	3.25	4.3	0.631579	0.614286	0	3.332	6.4	4.998	74	69	26	14	14.9	29	2	5	110	40	0	13	110	40	37.5	26	0	0.00279819	0.0205128
									42	1	1	1			21.31	37	86	23	6.6	8.53	8.5	8	4.14	4.4	0.447059	0.55	0.5	3.412	6.1	5.118	63	68	41.3	16	18	48	1.7	3	36	37	20.5	14	36	37	18.8	15	0.000687735	0.00301566	0.00769458
									51	1			1		25.83	37	87	25	6.8	5.46	8.1	8.1	3.51	4.7	0.469136	0.580247	1.8	2.184	6.8	3.276	71	68	5.6	17	13	4	2.1	5	83	39	14	16	83	39	28.4	34	0.0019943	0.00206525	0.0152833
									37	1	1	1			25.65	42	86	12	6.9	3.54	6.7	8.2	3.29	4.8	0.731343	0.585366	0.6	1.416	6.3	2.124	84	67	15.5	18	14.1	20	2	4	32	28	17.6	16	32	28	16.3	21	0.000891591	0.00131111	0.00867021
									56	2					21.79	36	83	34	7.1	6.54	7	7.4	3.39	6	0.728571	0.810811	3.3	2.616	3.8	3.924	72	65	16.1	19	20.2	9	1.9	1	73	17	34.7	12	73	17	33	13	0.00938299	0.00145333	0.0102753
									56	1					27.06	36	80	12	7.2	5.23	7.9	7.9	4.52	5.6	0.658228	0.708861	4.3	2.092	2.9	3.138	49	71	25.9	17	13.1	14	1.4	2	43	16	15.8	12	43	16	22.6	13	0.00417527	0.00124524	0.00402778
									56	2	1				19.88	36	80	9	7.9	10.53	7	7.6	3.47	5.2	0.542857	0.684211	2.4	4.212	5.5	6.318	59	66	3.2	13	3.5	12	2.9	3	96	17	36.1	12	96	17	37.1	13	0.00693564	0.0027	0.0163345
									56	1		1			25	41	84	14	9.8	6.42	8.2	8.8	4.1	5.3	0.463415	0.602273	3.6	2.568	6.2	3.852	64	71	2.9	21	7	9	2.4	4	35	12	14.9	46	35	12	16.3	11	0.00363415	0.00619119	0.00684688
									56	2	1			1	24.09	40	85	12	10.2	1.54	7.9	7.9	3.26	6	0.620253	0.759494	1.2	0.616	9	0.924	76	62	2.6	9	7.6	66	2.3	5	95	23	21.8	13	95	23	28.4	14	0.00222904	0.00037074	0.0217791
									51	2			1		25.83	37	84	15	11.4	5.63	7.4	7	2.53	5.5	0.783784	0.785714	0.3	2.252	11.1	3.378	68	64	3.1	24	3.8	10	2.4	2	48	12	16.8	36	48	12	18.5	11	0.00055336	0.00409455	0.0225461
									47	2		1			24.1	36	76	23	11.5	19.53	7.6	8.6	3.44	5.6	0.671053	0.651163	0.8	7.812	10.7	11.718	60	53	5.6	25	12.1	46	2.1	2	106	32	19.7	16	106	32	26.1	17	0.00127261	0.0062	0.0225509
									56	1	1				21.79	34	81	19	13.5	9.42	7.2	7.4	3.06	5.7	0.597222	0.77027	4.2	3.768	9.4	5.652	69	71	10.5	6	14.4	24	1.9	4	78	34	25.3	17	78	34	26.5	18	0.00964597	0.00312164	0.0226126
									37	1		1	1		20.1	40	92	14	15.7	14.92	8.6	8.7	4.59	4.3	0.534884	0.494253	5.2	5.968	10.4	8.952	79	65	12.8	5	1.7	9	1.6	2	109	35	23.1	14	109	35	30.3	23	0.00726943	0.00539742	0.0190704
									53	1	1				26.57	36	80	11	16.1	37.68	7.9	7.6	3.39	4.5	0.531646	0.592105	0	15.072	16.1	22.608	60	53	22.5	32	33.8	10	2.2	5	108	98	0	56	108	98	37.3	75	0	0.0521007	0.0492076
									32	1		1			34.27	36	87	12	17.1	17.67	8.6	8.8	3.4	4.1	0.55814	0.465909	1.6	7.068	15.5	10.602	66	67	17.8	35	23.8	13	1.6	3	114	43	13.3	14	114	43	34.7	15	0.00173856	0.00670407	0.043942
									38	1					29.38	39	85	20	20	14.28	7.5	7.6	4.23	4.5	0.84	0.592105	5.7	5.712	14.3	8.568	72	62	3.7	36	7.1	30	1.4	2	95	35	19.7	16	95	35	25.5	17	0.00737392	0.00564148	0.023946
									47	1					26.45	37	83	23	20.1	13.53	7.5	7.7	3.25	3.4	0.786667	0.441558	3.5	5.412	16.6	8.118	70	68	112.8	33	12.6	52	2.6	4	100	110	17.9	37	100	110	22.4	63	0.0053547	0.0163598	0.0317812
									34	1	1	1		1	20.7	39	85	8	20.1	27.31	6.5	7.1	3.5	4.3	0.830769	0.605634	5.2	10.924	14.9	16.386	76	65	1	22	2.4	32	2.3	8	45	18	20	14	45	18	19.1	15	0.00825397	0.00987959	0.0225865
									49	2					24.3	36	81	112	20.2	8.43	8.1	8	3.45	4.5	0.567901	0.5625	0.3	3.372	20	5.058	83	70	1.9	12	2.4	19	1.9	3	80	106	16.1	44	80	106	24.7	75	0.000388889	0.00915852	0.0397746
									51	2					25.59	39	87	14	20.2	39.59	8.8	8	5.12	3.5	0.647727	0.4375	0.4	15.836	19.8	23.754	74	78	87.4	30	61.9	9	1.2	5	108	42	24.7	25	108	42	31.6	26	0.000536024	0.0314206	0.0339453
									55	2	1				32.87	37	87	23	20.4	16.27	6.8	6.9	4.21	4.6	0.735294	0.666667	6	6.508	14.5	9.762	60	69	6.2	5	12.2	20	1.8	2	68	85	16.2	11	68	85	17.1	65	0.0064133	0.00432295	0.0163599
									29	1			1		31.51	39	89	25	20.5	28.5	9.1	9	4.06	4.7	0.637363	0.522222	2.7	11.4	17.8	17.1	82	67	20.6	28	18.4	37	2	1	81	103	14.7	24	81	103	15.7	47	0.00271552	0.0161702	0.0191201
									38	2					29.32	32	85	12	21.3	48.42	7.6	7.4	4.08	4.8	0.552632	0.648649	3.9	19.368	17.4	29.052	62	68	2	7	2.4	56	1.9	21	100	23	15.7	17	100	23	21.8	21	0.00416871	0.0190542	0.0258252
									38	1					23.81	36	80	11	22.7	16.65	8.6	7.6	3.26	4.3	0.639535	0.565789	8.7	6.66	14	9.99	70	69	19.3	6	20.2	17	2	13	47	111	15.8	47	47	111	19.2	65	0.0117127	0.0202209	0.0229039
									36	1	1		1		24.03	39	87	12	23.1	18.8	6.7	6.2	4.38	5	0.671642	0.806452	4.3	7.52	18.7	11.28	85	66	4.2	6	3.9	9	1.3	14	76	87	21.8	20	76	87	29.7	75	0.00594495	0.00835556	0.0352226
									52	1					28.04	42	92	21	23.6	22.05	7.4	7.4	4.42	4.5	0.743243	0.608108	3.4	8.82	20.2	13.23	57	59	5.1	4	11.1	28	1.9	14	96	58	21	16	96	58	38.1	17	0.00448718	0.00871111	0.0483673
									42	2	1	1			21.31	37	86	23	24.3	27.96	8.6	7.6	4.16	4.5	0.488372	0.592105	6.5	11.184	17.8	16.776	76	73	2.1	64	2.4	10	1.9	15	86	95	19.3	12	86	95	29.8	34	0.00837674	0.00828444	0.0354193
									51	1				1	25.83	37	87	25	24.5	19.66	8.9	7.9	4.51	4.3	0.629213	0.544304	5.8	7.864	18.8	11.796	51	75	3	4	7.3	22	1.6	15	88	110	21.6	15	88	110	33.5	75	0.00771619	0.00762016	0.0387903
									37	1					25.65	42	86	12	25	58.67	7.9	7.5	4.38	3.4	0.734177	0.453333	6.2	23.468	18.7	35.202	60	74	4.1	7	7.4	62	1.3	12	63	85	15.6	23	63	85	24.4	24	0.00613394	0.0440984	0.0289371
									46	1			1		24.84	38	84	21	25.3	15.57	7.1	7.2	4.06	4.5	0.774648	0.625	1.5	6.228	23.9	9.342	67	73	7.5	3	9.2	22	1.9	12	105	97	25.7	16	105	97	32.8	56	0.00263752	0.00615111	0.0536344
									26	1	1				23.62	37	87	22	27.4	17.77	7.3	7.6	4.59	6	0.520548	0.789474	4.8	7.108	22.6	10.662	65	76	5.8	5	18.5	13	2	52	87	110	11.5	35	87	110	21.9	84	0.0033406	0.0115176	0.0299528
									52	1					21.45	36	80	12	28.3	27.31	7.8	7.8	4.44	5.9	0.551282	0.75641	13.1	10.924	15.2	16.386	57	69	3.6	7	3.8	42	3	60	106	76	32.6	16	106	76	26.6	17	0.026718	0.008229	0.0252953
									38	1	1	1			23.44	36	85	14	28.6	21.13	8.2	8.1	4.5	5.3	0.512195	0.654321	4.3	8.452	24.2	12.678	73	67	8.6	55	19.6	18	1.9	76	116	98	30.8	27	116	98	35.1	56	0.00817531	0.0119604	0.0524333
									62	2					25.1	37	84	11	28.9	12.52	9.1	8.9	4.11	5.6	0.604396	0.629213	2.9	5.008	26	7.512	69	65	6.1	4	6.3	68	1.7	12	78	96	12.1	23	78	96	22.2	74	0.00237159	0.00571349	0.0390105
									29	1			1		31.51	39	85	12	29.1	31.47	8.2	8	4.52	4.5	0.658537	0.5625	2.5	12.588	26.7	18.882	95	65	47.3	35	23.6	5	1	12	68	94	11.8	25	68	94	16.6	73	0.00181293	0.0194259	0.0272382
									53	2	1				26.57	37	86	24	30.7	15.42	6.6	6.8	4.53	3.5	0.848485	0.514706	0.6	6.168	30.1	9.252	60	70	8.2	5	5.7	26	1.4	36	118	94	16.2	24	118	94	26.3	54	0.000596026	0.0117486	0.0485424
									32	1				1	26.64	37	83	12	31	36.76	7.3	7.1	4.41	6.4	0.671233	0.901408	0.6	14.704	30.3	22.056	61	69	4.1	33	14.8	27	2.1	13	108	97	28.9	14	108	97	28.1	54	0.00109221	0.00893472	0.05363
									84	1					27.76	42	83	23	31.4	22.61	7	7.1	4.39	4.2	0.771429	0.591549	3.2	9.044	28.2	13.566	68	71	3.7	13	3	18	1.5	16	120	123	28.1	25	120	123	39.7	26	0.0056897	0.0149537	0.070839
									27	1	1		1		30.07	32	82	21	32	22.16	7.8	8.2	5.28	4.2	0.615385	0.512195	16.3	8.864	15.7	13.296	57	74	15.2	60	8.3	13	1.3	28	118	91	53.7	26	118	91	62.4	87	0.0460496	0.0152423	0.0515404
									35	1					25.47	36	90	14	33.9	36.16	8.2	8.4	4.23	4.3	0.621951	0.511905	0.7	14.464	33.2	21.696	68	75	12.2	5	18.8	9	1.6	24	100	76	10.2	12	100	76	22.4	12	0.000468873	0.0112124	0.0488364
									47	1	1	1			25.95	36	85	21	34.3	29.19	7.3	6.7	5.27	4.3	0.589041	0.641791	13.4	11.676	20.9	17.514	49	69	3.5	53	2	9	1.5	36	112	101	27.2	30	112	101	36.7	31	0.0192115	0.0226279	0.0404296
									72	1					24.91	39	88	23	35.9	32.14	8.5	8.6	6.14	4.4	0.517647	0.511628	4.8	12.856	31.1	19.284	60	77	12.7	36	18.8	10	1.3	14	120	97	24.9	27	120	97	43.2	28	0.00540717	0.0219136	0.0607818
									65	2				1	29.41	40	83	14	36.3	31.93	7.6	8.7	5.57	4.5	0.5	0.517241	10.2	12.772	26	19.158	50	70	7.1	5	9.4	7	1.3	40	97	95	29.1	17	97	95	37.8	18	0.0148025	0.0134027	0.0490126
									71	2	1				23.44	37	85	23	36.4	52.54	7.8	8	5.23	6	0.75641	0.75	0.2	21.016	36.2	31.524	72	76	14	36	15.9	38	1.7	36	108	44	35.6	20	108	44	29.8	21	0.00037816	0.0194593	0.0572955
									63	1					23.05	38	84	21	39.8	43.33	7	8	4.48	5.2	0.8	0.65	17.3	17.332	22.5	25.998	57	66	8.4	5	12.8	40	1.7	12	114	98	28.1	11	114	98	31.5	12	0.030142	0.0101844	0.0439453
									47	1	1	1			31.64	32	85	23	40.1	87.43	8.9	8.9	6.17	6	0.539326	0.674157	20.2	34.972	19.9	52.458	78	64	14.5	7	19.3	18	0.8	14	113	90	39.4	29	113	90	39	25	0.0358311	0.0469531	0.0349406
									18	2					20.71	37	87	18	40.4	54.25	7.6	7.3	5.13	6	0.815789	0.821918	2.1	21.7	38.3	32.55	65	67	1.4	4	1.8	40	1.7	15	112	125	16.2	12	112	125	23.3	64	0.0018421	0.0120556	0.0483209
									43	1					26.35	43	86	21	41.8	65.34	7.6	7.4	4.31	5.6	0.578947	0.756757	5.5	26.136	36.3	39.204	66	65	59.4	34	22.7	57	1.3	1	93	115	19.7	16	93	115	32.1	35	0.00698311	0.0207429	0.0750986
									17	1		1	1		33.41	43	85	22	42.2	73.43	7.3	7.8	5.18	4.3	0.808219	0.551282	14.9	29.372	27.3	44.058	66	69	4.7	36	7.9	20	1.7	12	98	87	29.4	11	98	87	28.5	11	0.023491	0.0208716	0.041723
									39	1	1			1	25.95	37	88	34	42.5	56.73	8.6	8.5	5.3	4.5	0.523256	0.529412	8.2	22.692	34.4	34.038	79	71	13.5	28	14.9	9	1.6	14	112	85	37.9	12	112	85	42.7	13	0.0162883	0.0168089	0.0769853
									54	1					34.27	37	84	19	42.6	54.6	7.9	7.8	5.28	4.3	0.544304	0.551282	8	21.84	34.6	32.76	71	66	36	3	28.1	36	1.3	28	91	97	26.5	11	91	97	29.8	12	0.0111532	0.0155194	0.0542445
									55	1					34.63	40	88	11	43.3	63.43	7.6	7.44	5.34	4.1	0.644737	0.551075	9.7	25.372	33.6	38.058	86	63	7.6	3	8.7	37	1.1	28	85	87	22.6	16	85	87	27.9	17	0.0114035	0.0275035	0.048764
									48	2			1		29.06	37	85	21	45.3	63.09	8.9	7.8	5.12	4.6	0.561798	0.589744	0.6	25.236	44.7	37.854	79	67	1.9	16	1	48	1.5	14	112	139	13	19	112	139	29.7	74	0.000423177	0.0289544	0.0720264
									33	1	1				36.99	32	82	10	45.8	63.27	8.6	9.1	6.01	6	0.604651	0.659341	1	25.308	44.8	37.962	84	55	22.7	33	24.8	15	1.2	15	70	98	12.5	16	70	98	18.5	17	0.000577741	0.0187467	0.0383065
									58	1		1		1	27.76	37	85	12	46.7	45.63	7.1	7.1	5.03	5.8	0.873239	0.816901	8.7	18.252	38	27.378	81	72	4	4	3.2	26	1.8	15	97	53	23.5	12	97	53	28.2	13	0.0112906	0.0104897	0.0591783
									53	1					26.37	42	88	21	46.8	62.01	8.5	7.3	5.1	5.9	0.529412	0.808219	31.3	24.804	15.5	37.206	70	66	26	37	33.6	17	1.5	1	115	40	39.9	16	115	40	33.2	17	0.0680212	0.0186847	0.0280283
									46	2		1			25.35	36	84	22	46.9	24.32	7.3	7	7.07	6	0.60274	0.857143	34.7	9.728	12.2	14.592	56	69	11.7	8	9.5	17	1	12	106	87	46.9	13	106	87	50.5	14	0.0639411	0.00585481	0.0242063
									64	1	1		1		22.68	37	88	21	47.2	72.33	7.6	6.9	5.47	6.3	0.723684	0.913043	18.7	28.932	28.5	43.398	76	67	20.7	6	10.2	5	1.2	14	113	89	32.8	13	113	89	49.6	15	0.0311477	0.0165836	0.0717855
									53	1					24.44	32	82	8	48.9	62.77	7.2	7.1	6.19	6.4	0.875	0.901408	7.3	25.108	41.6	37.662	75	69	22.6	57	22.2	53	0.9	4	104	95	24.5	20	104	95	40.7	31	0.00802594	0.0217951	0.0759792
									39	1					31.89	37	86	23	49.7	81.31	8.6	7.3	5.21	3.9	0.523256	0.534247	10.8	32.524	38.9	48.786	87	71	60.1	8	57.1	31	1.5	6	107	95	31.1	12	107	95	29.4	12	0.0179079	0.0277983	0.0609757
									67	1					30.43	34	85	20	50.5	72.14	6.8	7.4	4.56	4.7	0.779412	0.635135	21.9	28.856	28.6	43.284	64	66	19.4	9	11.8	21	1.6	6	92	97	32.6	23	92	97	31.6	27	0.0434905	0.0392251	0.0550536
									56	1					25.95	37	89	21	51.3	45.62	6.6	7.5	5.21	4.8	0.772727	0.64	34.3	18.248	17	27.372	82	60	64.6	29	48.4	71	1.3	7	109	98	36.3	25	109	98	27.4	26	0.0663836	0.0264005	0.0248347
									46	1	1		1		26.03	38	81	19	51.4	36.65	7.6	7.6	6.2	4.9	0.75	0.644737	6	14.66	45.4	21.99	87	71	102	3	67.7	8	1.1	3	119	95	28.8	10	119	95	34.4	11	0.00774194	0.00831066	0.0699713
									43	1		1			23.94	42	84	18	53.6	56.3	7.6	7.7	4.13	5	0.605263	0.649351	14.4	22.52	39.2	33.78	64	59	8.3	12	8.3	21	2.4	7	116	143	16.4	10	116	143	19.2	75	0.0158838	0.0125111	0.0506215
									36	1					28.13	41	83	21	53.7	81.02	6.9	7.8	5.05	5.1	0.753623	0.653846	44.5	32.408	9.2	48.612	69	62	30.9	5	33.5	9	1.4	5	94	104	43.7	23	94	104	36.6	84	0.106966	0.0405983	0.0185215
									59	1	1				23.32	37	85	11	54.4	42.45	8.3	7.9	5.18	5.3	0.518072	0.670886	17.7	16.98	36.7	25.47	65	65	31.4	4	17.7	29	1.3	4	84	164	29.9	11	84	164	35.6	74	0.02838	0.00978931	0.0700622
									49	1			1		25.65	36	82	30	55.7	54.35	7.7	8	6.01	5.4	0.753247	0.675	18.6	21.74	37.1	32.61	67	70	40.9	6	35.3	49	0.8	3	105	123	26.8	10	105	123	36.4	54	0.0230394	0.0111831	0.0624163
									60	1					27.82	36	80	21	57.4	58.24	7.4	8.1	4.56	5.1	0.837838	0.62963	16	23.296	41.4	34.944	83	74	90.8	4	48.1	17	1.4	4	113	23	19.2	21	113	23	23.5	21	0.0187134	0.0266457	0.0592654
									49	1	1				29.97	37	87	23	60.6	48.91	8.3	8.2	4.37	5.2	0.626506	0.634146	12.1	19.564	48.5	29.346	79	59	20.7	4	30.3	60	1.1	32	74	143	23.8	12	74	143	22.3	13	0.0183054	0.012541	0.0687484
									57	2					25.39	34	78	28	61.3	25.64	6.5	8.3	5.5	5.3	0.753846	0.638554	20.2	10.256	41.1	15.384	66	63	50.9	44	46.3	18	1	5	59	154	26	14	59	154	32.6	73	0.0265253	0.00752537	0.0676697
									55	1			1		24.09	35	85	23	62.1	39.29	7.9	8.5	5.02	5.1	0.797468	0.6	16.1	15.716	46	23.574	67	72	56.5	15	37.9	21	1.4	24	102	143	31.8	16	102	143	32.9	74	0.02833	0.0136959	0.0837428
									53	1					29.74	37	89	14	62.4	58.38	7.5	8.6	5.43	5.2	0.573333	0.604651	40.1	23.352	22.4	35.028	77	67	28.7	46	29.9	22	1.2	40	111	154	42.2	29	111	154	33.8	57	0.0865674	0.0361756	0.0387313
									55	1	1				28.7	37	85	23	66.2	47.32	9.2	8.7	6.54	5.3	0.641304	0.609195	36.8	18.928	29.4	28.392	65	61	17.6	23	23.2	18	1.2	32	97	164	25	12	97	164	34.6	13	0.0390758	0.0119044	0.0432059
									47	1					26.45	36	83	21	66.7	52	6.7	8.8	6.35	5.4	0.850746	0.613636	51.3	20.8	15.3	31.2	62	72	29	34	44.7	14	1.2	40	110	109	34.8	16	110	109	34	24	0.0780945	0.0171193	0.0227559
									50	1					24.16	32	87	26	66.9	32.19	7.9	8.9	6.33	5.5	0.797468	0.617978	48.2	12.876	18.6	19.314	70	67	44.1	36	56.5	6	1.1	40	98	134	37.1	27	98	134	36.6	28	0.078472	0.0175582	0.0298736
									32	1					21.97	39	82	27	69.6	56.32	7.2	9	6.53	5.6	0.736111	0.622222	57.5	22.528	12.1	33.792	84	70	49.6	46	48.4	4	1	40	105	154	36.6	20	105	154	34.2	21	0.0895227	0.0223492	0.0176034
									57	1					20.76	36	81	7	69.9	44.24	8.1	9.3	5.4	5.7	0.617284	0.612903	27.7	17.696	42.2	26.544	57	65	0.6	2	0.6	7	1.4	28	96	165	24.5	21	96	165	25.1	23	0.03491	0.0181099	0.0544866
									59	1					27.18	42	84	19	72.5	49.37	6.5	8.9	6.44	6	0.876923	0.674157	50.2	19.748	22.3	29.622	85	70	58.1	54	64.1	33	1	68	77	102	27.3	36	77	102	26.3	85	0.0591123	0.0329133	0.0252972
									52	2	1				33.56	37	81	8	72.5	48.04	7.6	8.3	5.52	6.4	0.552632	0.771084	7.3	19.216	65.2	28.824	64	62	9	6	14.3	4	1.2	72	67	86	22.2	10	67	86	23.8	10	0.00815519	0.00834028	0.0780878
									51	1					27.7	39	85	12	73.7	55.64	8.2	8.6	5.57	5.7	0.463415	0.662791	8.1	22.256	65.6	33.384	62	59	19.3	26	32.1	5	1.3	52	104	65	18.8	21	104	65	24.2	26	0.00759426	0.0227766	0.0791702
									53	1	1				36.93	42	86	17	75.5	54.34	7.7	8	6.28	6.5	0.818182	0.8125	42.9	21.736	32.6	32.604	71	69	26.3	12	38.8	64	1.1	3	96	68	29.1	10	96	68	29.2	11	0.0552189	0.00928889	0.0421054
									66	1					23.18	36	84	12	80.9	35.26	6.9	7.7	6.15	4	0.84058	0.519481	25.4	14.104	55.4	21.156	65	70	46.7	14	36.8	63	1.3	1	92	87	27.9	23	92	87	26	18	0.0320081	0.0225272	0.0650587
									52	1					30.67	34	81	15	85.3	35.25	7.1	8	6.14	4.1	0.802817	0.5125	34.8	14.1	50.5	21.15	92	71	45.9	75	25.9	5	1.6	13	106	86	19.3	31	106	86	22.2	26	0.0303855	0.0296138	0.0507193
									52	2	1				26.29	37	85	12	86.1	33.53	6.7	9	6.29	4.2	0.80597	0.466667	15.9	13.412	70.2	20.118	87	68	21.5	16	27.7	22	1.2	32	79	94	21.7	21	79	94	21.9	23	0.0152371	0.0186278	0.0678935
									36	1					33.86	37	82	26	88.2	35.42	6.8	8	6.22	4.3	0.926471	0.5375	13.8	14.168	74.4	21.252	73	65	65.3	36	74.9	24	1.1	40	73	76	16.6	17	73	76	24	21	0.0102304	0.0155592	0.0797428
									60	1	1				27.06	36	76	12	92.2	32.57	7.4	9.3	6.21	6	0.567568	0.645161	45.1	13.028	47	19.542	60	79	72.7	45	44.3	62	1.1	13	99	87	25.7	16	99	87	28	16	0.051846	0.00965037	0.0588656
									40	1	1				26.93	38	84	19	96.4	37.73	7.2	7.1	6.45	6.6	0.805556	0.929577	84.1	15.092	12.3	22.638	78	59	98	64	74.7	1	1	36	89	65	25.1	16	89	65	24	12	0.0909091	0.010163	0.0127132
[truncated: 1 more columns]
